# Supplementary material
Source: PubMed Central journal article supplement (PMC7097838)

## Supplementary Online Content

Pompeii LA, Kraft CS, Brownsword EA, et al. Training and fit testing of health care personnel for reusable elastomeric half-mask respirators compared with disposable N95 respirators. *JAMA*. Published online March 25, 2020. doi:10.1001/jama.2020.4806

**eFigure.** Elastomeric Half-Mask Respirator and N95 Respirator

This supplementary material has been provided by the authors to give readers additional information about their work.

eFigure. Elastomeric Half-Mask Respirator and N95 Respirator (Photos Courtesy from NIOSH and 3M)

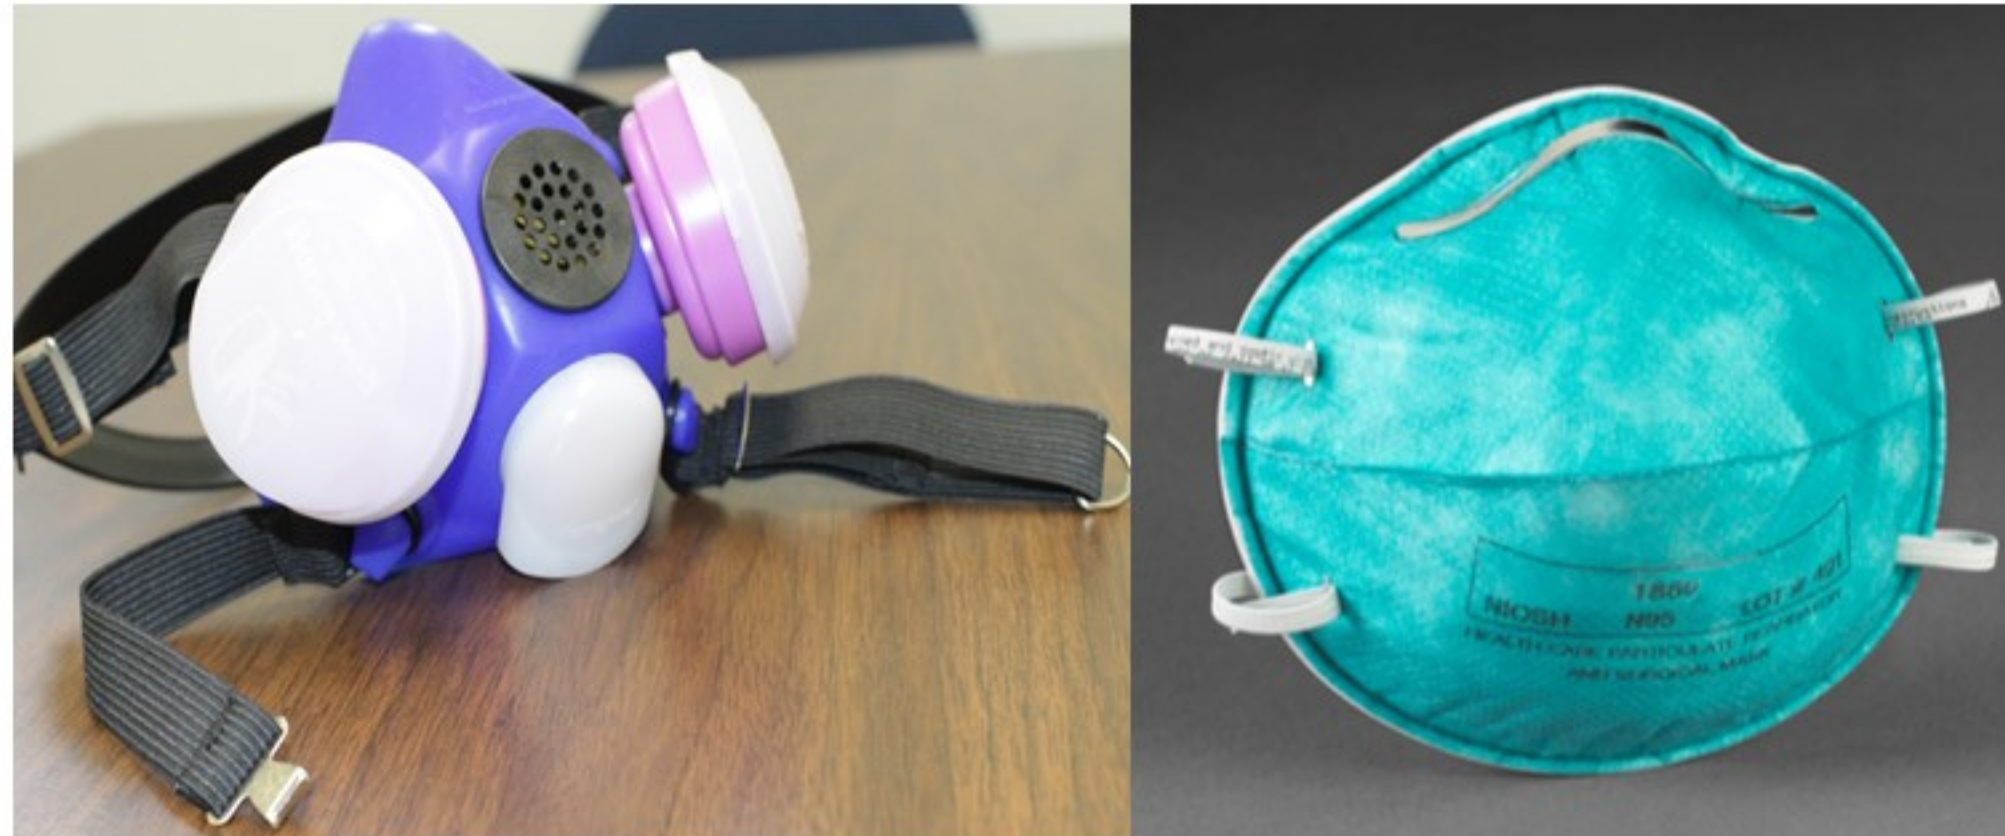

Supplement: jama-323-1849-s001.pdf [file jama-323-1849-s001.pdf]
